# Supplementary material for: Toxicological Risks of Agrochemical Spray Adjuvants: Organosilicone Surfactants May Not Be Safe
Source: Front Public Health. 2016 May 11;4:92. doi: 10.3389/fpubh.2016.00092 (PMC4862968; doi:10.3389/fpubh.2016.00092)
Supplement: Supplementary file 1 [file table_1.docx]

**Table S1 |** **List of organosilicone surfactant products used on**

**California almonds during January to March of 2001 through 2013.**

#233 Wet-Sol Concentrate® Aero Dyne-Amic® Ag Rx Multi-Spred® Bac Spred Stik® Break-Thru® Britz Fenish Silicone Surfactant® Britz Silglow® Broad Spred® Bronc Plus Dry-Edt® Cadence® CMR Can-Hance® CMR Silicone Surfactant® Dyne-Amic® Faststrike® First Choice Break-Thru® First Choice Hi-Wett® First Choice Solar Methylated Seed Oil With Organosilicone® Foam Fighter® Freeway® Hi-Wett Super-Spreader® Kinetic® Metho-Sil® Multi-Spred® Organosilicone MVO Modified Vegetable Oil And Surfactant Blend® Phase® PHT Faststrike® PHT Quark® PHT Silglow® Pro Multi-Spred® Pro Silicone 100® Quark® RNA Si 100® Silicone Super Wetter® Silicone Surfactant® Silkin® Silwet 806® Silwet L-77® Syl-Coat® Syl-Tac® Sylgard 309® Tactic® Unfoamer® Vader® Widespread® Widespread Max®

Based on Pesticide Use Reporting database of California Department of Pesticide Regulations (55).
